1 **Effects of long-term unmet needs and unmet rehabilitation needs on the quality of life in**  
2 **stroke survivors**

3 Yookyung Lee MD MS<sup>1\*</sup>, Won-Seok Kim MD PhD<sup>2\*</sup>, Won Kee Chang MD MS<sup>2</sup>, Yun Sun  
4 Jung MPH PhD<sup>2</sup>, Sungju Jee MD PhD<sup>3</sup>, Sung-Hwa Ko MD PhD<sup>4</sup>, Min Kyun Sohn MD  
5 PhD<sup>3</sup>, Yong-Il Shin MD PhD<sup>4</sup>, Hee-Joon Bae MD PhD<sup>5</sup>, Beom Joon Kim MD PhD<sup>5</sup>, Jun Yup  
6 Kim MD MS<sup>5</sup>, Dong-Ick Shin MD PhD<sup>6</sup>, Kyu Sun Yum MD PhD<sup>6</sup>, Hee-Yun Chae MD MS<sup>6</sup>,  
7 Dae-Hyun Kim MD PhD<sup>7</sup>, Jae-Kwan Cha MD PhD<sup>7</sup>, Man-Seok Park MD PhD<sup>8</sup>, Joon-Tae  
8 Kim MD PhD<sup>8</sup>, Kang-Ho Choi MD PhD<sup>8</sup>, Jihoon Kang MD PhD<sup>5</sup>, Nam-Jong Paik MD PhD<sup>2</sup>

9

10 <sup>1</sup>Department of Physical and Rehabilitation Medicine, Chung-Ang University Gwang-  
11 Myeong Hospital, Gwang-Myeong, Gyeonggi-do, Republic of Korea

12 <sup>2</sup>Department of Rehabilitation Medicine, Seoul National University College of Medicine,  
13 Seoul National University Bundang Hospital, Republic of Korea

14 <sup>3</sup>Department of Rehabilitation Medicine, Chungnam National University Hospital and  
15 Chungnam National University College of Medicine, Daejeon, Korea

16 <sup>4</sup>Department of Rehabilitation Medicine, Pusan National University Yangsan Hospital, Pusan  
17 National University School of Medicine, Pusan, Korea

18 <sup>5</sup>Department of Neurology, Cerebrovascular Center, Seoul National University Bundang  
19 Hospital, Seoul National University, Republic of Korea

20 <sup>6</sup>Department of Neurology, Chungbuk National University Hospital, Chungbuk National  
21 University College of Medicine, Cheongju, Korea

22 <sup>7</sup>Department of Neurology, Dong-A University Hospital, Dong-A University College of  
23 Medicine, Busan, Korea

24 <sup>8</sup>Department of Neurology, Chonnam National University Medical School and Hospital,  
25 Gwangju, Korea

**NOTE: This preprint reports new research that has not been certified by peer review and should not be used to guide clinical practice.**

26 \*These authors contributed equally to this work.

27

28 **Short title:** Unmet rehabilitation needs in stroke survivors

29

30 **Corresponding authors**

31 Nam-Jong Paik, MD, PhD

32 Department of Rehabilitation Medicine, Seoul National University College of Medicine,

33 Seoul National University Bundang Hospital, 82 Gumi-ro 173 Beon-gil, Bundang-gu,

34 Seongnam 13620, Korea

35 Tel: +82-31-787-7731

36 Fax: +82-31-712-3913

37 E-mail: [njpaik@snu.ac.kr](mailto:njpaik@snu.ac.kr)

38

39 Jihoon Kang, MD, PhD

40 Department of Neurology, Cerebrovascular Center, Seoul National University Bundang

41 Hospital, Seoul National University, 82 Gumi-ro 173 Beon-gil, Bundang-gu, Seongnam

42 13620, Korea

43 Tel +82-31-787-7818

44 Fax +82-31-787-4059

45 E-mail: [kangjihoon0913@gmail.com](mailto:kangjihoon0913@gmail.com)

46

47 **Word count:** 4,801

48

49 **Abstract**

50 **Background**

51 Unmet long-term needs and rehabilitation needs are prevalent among stroke survivors and  
52 affect their quality of life. We aimed to identify the long-term unmet needs and unmet  
53 rehabilitation needs among stroke survivors in South Korea and evaluate their  
54 intercorrelations with health-related quality of life.

55 **Methods**

56 Stroke survivors who were admitted to four Regional Cardiocerebrovascular Disease Centers  
57 between January 1, 2015 and December 31, 2019 were telephonically surveyed using a  
58 computer-assisted telephone interview method. With the aim of surveying approximately  
59 1,000 patients, 9,204 people were recruited through random sampling. Unmet needs were  
60 evaluated on the basis of Longer-term Unmet Needs after Stroke questionnaire items. Quality  
61 of life was evaluated using the EuroQoL 5-dimension, 3-level (EQ-5D-3L) questionnaire and  
62 the EQ-5D index.

63 **Results**

64 Among the participants, 93.6% experienced at least one unmet need and 311 (32.6%)  
65 reported unmet rehabilitation needs. The number of unmet needs, age, modified Rankin Scale  
66 (mRS) score, and previous stroke showed significant negative correlations with the EQ-5D  
67 index ( $p$ -value  $< 0.05$ ). The age-adjusted odds ratio (OR) for reporting unmet rehabilitation  
68 needs significantly increased with problems in mobility (OR, 4.96; 95% confidence interval  
69 [CI], 3.64-6.76), self-care (OR, 4.46; 95% CI, 3.32-5.98), usual activities (OR, 5.78; 95% CI,  
70 4.21-7.93), pain/discomfort (OR, 3.76; 95% CI, 2.76-5.06), anxiety/depression (OR, 3.67;  
71 95% CI, 2.74-4.91), higher mRS score (OR, 3.13; 95% CI, 2.29-4.28), prior hyperlipidemia  
72 (OR, 1.35; 95% CI, 1.00-1.81), and number of unmet needs (OR, 1.30; 95% CI, 1.25-1.36).

73 **Conclusions**

74 Unmet needs were prevalent among stroke survivors and were associated with a lower quality  
75 of life and increased odds of reporting unmet rehabilitation needs. Further research is needed  
76 to investigate strategies for addressing these subjective unmet needs with the aim of  
77 improving the long-term quality of life of stroke survivors.

78

79 **Key words:** Stroke, Stroke rehabilitation, Quality of life

80

### 81 **Abbreviations**

|    |          |                                               |
|----|----------|-----------------------------------------------|
| 82 | CI       | Confidence interval                           |
| 83 | EQ-5D-3L | EuroQoL 5-dimension, 3-level                  |
| 84 | LTC      | Long-term care                                |
| 85 | LUNS     | Longer-term Unmet Needs after Stroke          |
| 86 | mRS      | modified Rankin Scale                         |
| 87 | NDRS     | National Disability Registration System       |
| 88 | NIHSS    | National Institutes of Health Stroke Scale    |
| 89 | OR       | Odds ratio                                    |
| 90 | QoL      | Quality of life                               |
| 91 | RCCVC    | Regional Cardiocerebrovascular Disease Center |
| 92 | SD       | Standard deviation                            |
| 93 | TIA      | Transient ischemic attack                     |

94

95

## 96 **Introduction**

97 Stroke is the second-leading cause of death and the third-leading cause of disability  
98 worldwide (1). It represents a substantial global burden, and its incidence is expected to  
99 increase with age (2,3). Many stroke survivors have disabilities, and unmet needs are highly  
100 prevalent among them (4,5). Depending on the study population and measurement tools, up  
101 to 97.5% of stroke survivors have reported long-term unmet needs after stroke (4). The  
102 presence of unmet long-term needs has been closely associated with poor functional  
103 outcomes (6,7).

104 Stroke survivors frequently experience unmet rehabilitation needs. Approximately one in  
105 three patients reported unmet rehabilitation needs post-stroke (7). These needs can influence  
106 the patients' health-related quality of life (7,8). A previous study showed that in community-  
107 dwelling stroke survivors, an increased number of unmet rehabilitation needs was  
108 significantly associated with a lower health-related quality of life (8).

109 Although numerous studies have explored long-term unmet needs and rehabilitation needs  
110 following stroke, the majority of these investigations have been conducted in Western  
111 countries. Studies of the West Pacific population are sparse and characterized by small  
112 sample sizes (4,5). The factors associated with unmet needs and their impact on outcomes  
113 and health-related quality of life remain largely unexplored within these populations.  
114 Consequently, we aimed to identify the long-term unmet needs and unmet rehabilitation  
115 needs among stroke survivors in South Korea and evaluate their intercorrelations with health-  
116 related quality of life.

117

## 118 **Methods**

119 This cross-sectional study followed the strengthening the reporting of observational studies in  
120 epidemiology guideline (9).

121

122 *Data Source*

123 In South Korea, Regional Cardiocerebrovascular Disease Centers (RCCVCs) were designated  
124 by the Ministry of Health and Welfare (<https://www.mohw.go.kr/eng/>) in 2008 for better  
125 prevention and treatment of stroke and acute myocardial infarction (10). Currently, 14  
126 hospitals are designated as RCCVCs nationwide. The RCCVC registry for acute ischemic  
127 stroke was launched in 2014, and efforts to improve data entry and prevent errors have been  
128 made through regular registry committee meetings and training workshops.

129

130 *Study Participants*

131 For this study, using the RCCVC registry databases of four centers (Seoul National  
132 University Bundang Hospital, Dong-A University Hospital, Jeonnam National University  
133 Hospital, and Chungbuk National University Hospital), we identified stroke survivors who  
134 were admitted to these centers between January 1, 2015, and December 31, 2019. Patients  
135 who provided consent for the use of their contact information, were aged 18 years or older,  
136 and had a modified Rankin Scale (mRS) score of 1-5 at 3 months post-stroke were included.  
137 Patients who were not community-dwelling or died within one year of follow-up were  
138 excluded. The number of eligible patients extracted from the databases of the four RCCVCs  
139 for the telephone survey was 9,204. The telephone survey was conducted by trained  
140 interviewers in Gallup Korea using a computer-assisted telephone interview method from  
141 December 2, 2020, to December 14, 2020. To survey 1,000 patients, 9,204 were recruited  
142 through random sampling. Among these 9,204 patients, 6,022 could not be reached and  
143 dropped out of the study. Of the 3,182 people contacted, 1,419 refused to participate, were  
144 busy, absent, or gave inappropriate responses and dropped out. A total of 761 patients were  
145 excluded because of death or admission to facilities such as hospitals and nursing homes. In

146 total, 1,002 survey respondents were included in the final analysis (Figure 1).

147

### 148 *Telephone Survey Questionnaire*

149 Screening was performed using the following questions: 1) Have you received stroke  
150 treatment at OOO Hospital? 2) Are you currently staying in a hospital, nursing hospital,  
151 nursing home, or another facility? If the answer was “no” for question 1 and “yes” or  
152 “deceased” for question 2, the patient was excluded, and the survey was terminated.

153 Unmet needs were evaluated using the Longer-term Unmet Needs after Stroke (LUNS)  
154 questionnaire items, which were developed to measure survivors’ long-term physical, social,  
155 and emotional well-being after stroke (11). The LUNS was translated and adapted to Korean  
156 and validated in 66 adults with stroke in our previous study (12). Considering the sentiments  
157 of Korean seniors, who tend to avoid discussing physical relationships, we excluded the  
158 “Advice on physical relationships” item from the 22 items of the LUNS. Quality of life  
159 (QoL) was evaluated using the EuroQoL 5-dimension, 3-level (EQ-5D-3L) questionnaire,  
160 and the EQ-5D index ranging from 0 (death) to 1 (best) was calculated using the Korean  
161 valuation set (13). Current functional status was assessed using a simplified modified Rankin  
162 Scale (mRS) questionnaire (14), and socioeconomic data, including the participants’  
163 education and residential area and whether they were living alone or not, were also collected.  
164 The perceived adequacy of rehabilitation after stroke was examined using the following  
165 question: Do you think that rehabilitation after stroke was adequately delivered? The  
166 response options were (i) completely inadequate; (ii) inadequate; (iii) adequate; (iv) very  
167 adequate; and (v) no need for rehabilitation. Responses 1 and 2 indicated perceived unmet  
168 rehabilitation needs, while responses 3-5 were considered to indicate met rehabilitation  
169 needs.

170

171 *Stroke-Related Variables*

172 Stroke-related variables, such as stroke type, initial National Institutes of Health Stroke Scale  
173 (NIHSS) score, discharge status, and demographic information, were gathered from the  
174 stroke registries of the RCCVCs. Medical histories associated with stroke risk, such as  
175 previous stroke, transient ischemic attack, coronary heart disease, hypertension, diabetes  
176 mellitus, hyperlipidemia, and atrial fibrillation, were also collected.

177

178 *Statistical Analysis*

179 All categorical values were presented as n (%), and the total number of unmet needs and EQ-  
180 5D scores were presented as mean  $\pm$  standard deviation. Multiple linear regression analysis  
181 with backward elimination was performed to analyze the factors associated with health-  
182 related QoL as measured using the EQ-5D. The t-test and chi-square test were used to analyze  
183 perceived unmet rehabilitation needs in relation to participant characteristics. Multiple  
184 logistic regression analysis was used to analyze factors associated with perceived unmet  
185 rehabilitation needs.

186 All statistical analyses were performed using SPSS for Windows software package (ver. 22.0;  
187 SPSS Inc., Chicago, IL, USA). Statistical significance was set at  $P < 0.05$ .

188

189 *Ethics Statement*

190 This study was conducted in accordance with the Declaration of Helsinki. The study protocol  
191 was approved by the Institutional Review Board of Seoul National University Bundang  
192 Hospital (IRB No. B-2009-639-302) and Chungbuk National University Hospital (IRB No.  
193 2020-12-014).

194

195 **Results**



196 The baseline characteristics of the study participants ( $n = 1,002$ ) are shown in Table 1. The  
197 mean participant age was  $69.26 \pm 12.43$  years, and 635 (63.4%) participants were men. The  
198 prevalence of participants with at least one unmet need was 93.6%, and the mean number of  
199 unmet needs was  $4.67 \pm 3.65$ . A total of 311 (32.6%) individuals stated that their  
200 rehabilitation needs were unmet.

201 The most frequently cited unmet needs after stroke were “Help with applying for benefits”  
202 (48.4%), “Advice on employment” (46.6%), and “Fear of falling” (37.7%) (Supplementary  
203 table 1). In the multiple linear regression analysis with backward elimination, the number of  
204 unmet needs, perceived unmet rehabilitation needs, age, mRS score, and previous stroke were  
205 significant factors that showed negative correlations with the EQ-5D index (Table 2). When  
206 adjusted for age, sex, and mRS score at the time of the survey, the total number of unmet  
207 needs differed significantly according to living area, education level, living alone, problems  
208 with mobility, self-care, usual activities, pain/discomfort, and anxiety/depression  
209 (Supplementary table 2).

210 Those reporting unmet rehabilitation needs were significantly older; had lower education  
211 levels; experienced problems in mobility, self-care, usual activities, pain/discomfort,  
212 anxiety/depression; and showed a higher mRS score at the time of survey, higher initial  
213 NIHSS score, prior stroke, higher number of unmet needs, and lower EQ-5D index values  
214 (Table 3).

215 The age-adjusted odds ratio (OR) for reporting unmet rehabilitation needs significantly  
216 increased with problems in mobility (OR, 4.96; 95% confidence interval [CI], 3.64-6.76),  
217 self-care (OR, 4.46; 95% CI, 3.32-5.98), usual activities (OR, 5.78; 95% CI, 4.21-7.93),  
218 pain/discomfort (OR, 3.76; 95% CI, 2.76-5.06), anxiety/depression (OR, 3.67; 95% CI, 2.74-  
219 4.91), higher mRS score (OR, 3.13; 95% CI, 2.29-4.28), prior hyperlipidemia (OR, 1.35; 95%  
220 CI, 1.00-1.81), and number of unmet needs (OR, 1.30; 95% CI, 1.25-1.36) (Table 4). The OR

221 significantly decreased with an educational level of college or higher (OR, 0.66; 95% CI,  
222 0.45-0.96). In the final model of multiple logistic regression analysis with backward  
223 elimination, problems in mobility (OR, 1.78; 95% CI, 1.16-2.74), usual activities (OR 1.95;  
224 95% CI 1.24-3.06), and higher number of unmet needs (OR 1.22; 95% CI 1.16-1.28) showed  
225 significant associations with perceived unmet rehabilitation needs (Supplementary table 3).

226

## 227 **Discussion**

228 Unmet and perceived unmet rehabilitation needs are highly prevalent among community-  
229 dwelling stroke survivors. In the present study, the number of unmet and perceived unmet  
230 rehabilitation needs was found to have a detrimental impact on health-related QoL, as  
231 assessed using the EQ-5D index. The likelihood of perceived unmet rehabilitation needs  
232 increased with an increase in the number of unmet needs and problems in the EQ-5D  
233 dimensions. Educational level, mRS score, and prior hyperlipidemia were also associated  
234 with perceived unmet rehabilitation needs.

235

### 236 *Long-term Unmet Needs after Stroke*

237 Most stroke survivors in the present study (93.6%) had long-term unmet needs. A recent  
238 systematic review reported that the prevalence of unmet needs among stroke survivors ranged  
239 from 15% to 97.5% (4). The prevalence of unmet needs in our study was at the higher end of  
240 this range. In our study, we used the LUNS questionnaire to evaluate unmet needs. Two  
241 previous studies using this questionnaire reported prevalence rates of 67.7% and 85.1%,  
242 respectively (11,15). The time post-stroke was 5-8 years in the one study and 3–6 months in  
243 the other. Our study evaluated stroke survivors 1-6 years post-stroke. The subtle disparities in  
244 prevalence observed among these studies may be attributed to variations in post-stroke

245 duration, the compositions of the study populations, and the influence of social and cultural  
246 factors (5).

247 In our study, the most frequently cited unmet needs were “Help with applying for benefits,”  
248 “Advice on employment,” and “Fear of falling.” These unmet needs contrast with those  
249 identified in a prior Dutch study of stroke survivors 5-8 years after stroke. In that study,  
250 which also used the LUNS questionnaire, “Information on stroke” was the most frequently  
251 mentioned unmet need followed by “Fear of falling” and “Help with concentration or  
252 memory” (15). In Korea, benefits for stroke survivors include the National Disability  
253 Registration System (NDRS) and long-term care (LTC) for the elderly (16,17). Stroke  
254 survivors are eligible for disability registration 6 months after the stroke (17). In 2008, Korea  
255 introduced LTC insurance to cover older adults in need of LTC. People aged 65 years or older  
256 or under 65 years with geriatric diseases (such as dementia cerebrovascular disease,  
257 Parkinson disease, and other neurological diseases) are eligible for LTC services (16). The  
258 unmet need in “Help with applying for benefits” may be due to lack of knowledge about the  
259 available benefits or difficulties in the process of applying for benefits. Thus, information on  
260 applying for benefits for persons with disabilities should be communicated in a manner that  
261 considers the specific challenges of stroke survivors, including limited transportation, issues  
262 related to digital literacy, communication problems, and cognitive impairments.

263 “Advice on employment” was an unmet need reported by 46.6% of stroke survivors. A  
264 previous study by Chang et al. reported that the rate of return to work was 60% in  
265 functionally independent Korean stroke survivors 6 months post-stroke (18). Older female  
266 stroke survivors with comorbidities and lower educational levels were less likely to return to  
267 work (18). Interventions to facilitate return to work include multidisciplinary assessment,  
268 identification of barriers to work, evaluation of the working environment, communication  
269 with employers, rehabilitation of working skills, education, and counseling (19). However,

270 standardized rehabilitation programs are unavailable, and evidence of the effectiveness of  
271 interventions remains weak (19). In this regard, additional research and implementation of  
272 vocational rehabilitation strategies aimed at increasing the rate of return to work warrant  
273 attention.

274

### 275 *Quality of Life*

276 The multiple linear regression model for health-related QoL (EQ-5D index) revealed that a  
277 higher number of unmet needs was significantly associated with a lower QoL, in addition to  
278 age, mRS score, and previous stroke. These results are consistent with the findings of  
279 previous studies. In a study by Kim et al., an increased number of unmet needs, older age,  
280 and mRS scores were significantly associated with a lower health-related QoL as measured  
281 by the EQ-5D index (8). In a study by Lehnerer et al., stroke survivors with unmet social  
282 needs had significantly lower EQ-5D index values than those with met needs (20). A higher  
283 number of unmet needs can lead to lower QoL in stroke survivors. Therefore, LTC systems  
284 that monitor and address unmet needs are needed to improve the QoL after stroke. In Korea,  
285 community-based rehabilitation is provided for LTC of community-dwelling disabled patients  
286 (21). Social care systems should systematically evaluate the unmet needs of stroke survivors  
287 and take action to enhance their QoL.

288

### 289 *Perceived Unmet Rehabilitation Needs*

290 The observed prevalence of unmet rehabilitation needs was 32.6%, which is consistent with a  
291 previously reported range of 15%-33% (7,22-24). In a study by Ullberg et al., female sex,  
292 living alone, smoking, atrial fibrillation, diabetes, somnolence, comatose status, prior stroke,  
293 and intracranial hemorrhage or unspecified stroke were all associated with an increased OR  
294 for unmet rehabilitation needs (7). Tistad et al. reported that strength at 3 months post-stroke,

295 hand function, and poor self-rated recovery at 12 months were significantly associated with  
296 unfulfilled rehabilitation needs at 12 months (23). Similarly, the present study showed that  
297 perceived unmet rehabilitation needs were significantly higher in stroke survivors with lower  
298 functional status and problems in domains related to QoL. Older stroke patients with lower  
299 educational levels also reported more unmet rehabilitation needs. This association of older  
300 age and lower educational levels with increased perceived unmet rehabilitation needs may be  
301 linked to the generally poorer health outcomes in these stroke survivors (25). Furthermore,  
302 older stroke survivors with lower educational and functional statuses may have more  
303 difficulties overcoming barriers to community-based rehabilitation, including those related to  
304 costs, accessibility, and knowledge (26). These perceived unmet rehabilitation needs in stroke  
305 patients with low functional status and multiple comorbidities can be addressed by more  
306 individualized rehabilitation plans with realistic goal-setting along with efforts to provide  
307 adequate rehabilitation for patient groups facing challenges in accessing medical  
308 rehabilitation services after stroke.

309

### 310 *Study Limitations*

311 This study had some limitations. First, of the 9,204 eligible patients, 1,002 were selected for  
312 the study, leading to a risk of non-response bias. Comparative analysis of survey responders  
313 with non-responders and the whole group revealed that responders were significantly  
314 younger, had a shorter time since stroke onset, lower stroke severity, lower mRS score at  
315 discharge, a higher proportion of home discharge, and fewer comorbidities (Supplementary  
316 table 4). These results may differ for survivors with more severe stroke. However, our  
317 findings indicated that even mild stroke survivors have significant unmet needs. Moreover,  
318 severe stroke is associated with a higher incidence of unmet needs. Thus, unmet needs may  
319 have been underestimated in this study. Second, our data were obtained from four centers and

320 may not be representative of the nationwide population of stroke survivors. Nonetheless,  
321 these centers are RCCVCs that play a significant role in the provision of stroke care. Thus,  
322 they may be considered representative institutions in their respective areas. Finally, the  
323 assessment of unmet needs was based on self-reports, and factors other than stroke may have  
324 influenced the reports on unmet needs.

325

### 326 *Conclusions*

327 Long-term unmet needs are prevalent in stroke survivors. Higher unmet needs were  
328 associated with a lower QoL and increased odds of reporting unmet rehabilitation needs. The  
329 likelihood of perceived unmet rehabilitation needs increased with higher stroke severity,  
330 lower functional status, hyperlipidemia, and a higher number of unmet needs. Further  
331 research is needed to investigate strategies for addressing these subjective unmet needs with  
332 the aim of improving the long-term QoL of stroke survivors.

333

### 334 **Acknowledgments**

335

### 336 **Sources of funding**

337 This research was supported by the “Korea National Institute of Health” Research. (Project  
338 No. 2020ER630602)

339

### 340 **Disclosures**

341 None.

342

343 **References**

- 344 1. GBD 2019 Stroke Collaborators. Global, regional, and national burden of stroke and  
345 its risk factors, 1990-2019: a systematic analysis for the Global Burden of Disease  
346 Study 2019. *Lancet. Neurology* 2021;20:795-820.
- 347 2. Thayabaranathan T, Kim J, Cadilhac DA, Thrift AG, Donnan GA, Howard G, Howard  
348 VJ, Rothwell PM, Feigin V, Norrving B, et al. Global stroke statistics 2022.  
349 *International Journal of Stroke* 2022;17:946-956.
- 350 3. Katan M, Luft A. Global burden of stroke. *Seminars in Neurology* 2018;38:208-211.
- 351 4. Lin BL, Mei YX, Wang WN, Wang SS, Li YS, Xu MY, Zhang ZX, Tong Y. Unmet  
352 care needs of community-dwelling stroke survivors: a systematic review of  
353 quantitative studies. *BMJ Open* 2021;11:e045560.
- 354 5. Chen T, Zhang B, Deng Y, Fan JC, Zhang L, Song F. Long-term unmet needs after  
355 stroke: systematic review of evidence from survey studies. *BMJ Open*  
356 2019;9:e028137.
- 357 6. McKevitt C, Fudge N, Redfern J, Sheldenkar A, Crichton S, Rudd AR, Forster A,  
358 Young J, Nazareth I, Silver LE, et al. Self-reported long-term needs after stroke.  
359 *Stroke* 2011;42:1398-1403.
- 360 7. Ullberg T, Zia E, Petersson J, Norrving B. Perceived unmet rehabilitation needs 1 year  
361 after stroke: an observational study from the Swedish stroke Register. *Stroke*  
362 2016;47:539-541.
- 363 8. Kim KT, Chang WK, Jung YS, Jee S, Sohn MK, Ko SH, Shin YI, Leigh JH, Kim WS,  
364 Paik NJ. Unmet needs for rehabilitative management in common health-related  
365 problems negatively impact the quality of life of community-dwelling stroke  
366 survivors. *Frontiers in Neurology* 2021;12:758536.
- 367 9. Vandembroucke JP, von Elm E, Altman DG, Gøtzsche PC, Mulrow CD, Pocock SJ,  
368 Poole C, Schlesselman JJ, Egger M; STROBE Initiative. STROBE initiative  
369 Strengthening the Reporting of Observational Studies in Epidemiology (STROBE):  
370 explanation and elaboration. *PLoS Med.* 2007; 4:e297. doi:  
371 10.1371/journal.pmed.0040297
- 372 10. Kim J, Hwang YH, Kim JT, Choi NC, Kang SY, Cha JK, Ha YS, Shin DI, Kim S, Lim  
373 BH. Establishment of government-initiated comprehensive stroke centers for acute  
374 ischemic stroke management in South Korea. *Stroke* 2014;45:2391-2396.
- 375 11. LoTS care LUNS study team. Validation of the longer-term unmet needs after stroke  
376 (LUNS) monitoring tool: a multicentre study. *Clinical Rehabilitation* 2013;27:1020-  
377 1028.
- 378 12. Baek S, Kim WS, Park YH, Jung YS, Chang WK, Kim G, Paik NJ. Korean Version of  
379 the Longer-Term Unmet Needs After Stroke Questionnaire. *Annals of Rehabilitation*  
380 *Medicine* 2023;47:367-376
- 381 13. Jo MW, Yun SC, Lee SI. Estimating quality weights for EQ-5D health states with the  
382 time trade-off method in South Korea. *Value in Health* 2008;11:1186-1189.
- 383 14. Chen X, Li J, Anderson CS, Lindley RI, Hackett ML, Robinson T, Lavados PM,  
384 Wang X, Arima H, Chalmers J, et al. Validation of the simplified modified Rankin  
385 scale for stroke trials: experience from the ENCHANTED alteplase-dose arm.  
386 *International Journal of Stroke* 2021;16:222-228.
- 387 15. Groeneveld IF, Arwert HJ, Goossens PH, Vliet Vlieland TPM. The longer-term unmet  
388 needs after stroke questionnaire: cross-cultural adaptation, reliability, and concurrent  
389 validity in a Dutch population. *Journal of Stroke & Cerebrovascular Diseases*  
390 2018;27:267-275.



- 391 16. Jeon B, Kwon S. Health and long-term care systems for older people in the Republic  
392 of Korea: policy challenges and lessons. *Health Systems & Reform* 2017;3:214-223.
- 393 17. Kim M, Jung W, Kim SY, Park JH, Shin DW. The Korea national disability  
394 registration system. *Epidemiology & Health* 2023;45:e2023053.
- 395 18. Chang WH, Sohn MK, Lee J, Kim DY, Lee SG, Shin YI, Oh GJ, Lee YS, Joo MC,  
396 Han EY, et al. Return to work after stroke: the KOSCO Study. *Journal of*  
397 *Rehabilitation Medicine* 2016;48:273-279.
- 398 19. Pearce G, O'Donnell J, Pimentel R, Blake E, Mackenzie L. Interventions to facilitate  
399 return to work after stroke: A systematic review. *International Journal of*  
400 *Environmental Research & Public Health* 2023;20.
- 401 20. Lehnerer S, Hotter B, Padberg I, Knispel P, Remstedt D, Liebenau A, Grittner U,  
402 Wellwood I, Meisel A, BSA Long Term Care Study Group. Social work support and  
403 unmet social needs in life after stroke: a cross-sectional exploratory study. *BMC*  
404 *Neurology* 2019;19:220.
- 405 21. Leigh JH, Kim WS, Sohn DG, Chang WK, Paik NJ. Transitional and long-term  
406 rehabilitation care system after stroke in Korea. *Frontiers in Neurology*  
407 2022;13:786648.
- 408 22. Heiberg G, Røe C, Friberg O, Pedersen SG, Holm Stabel H, Nielsen JF, Anke A.  
409 Factors associated with met and unmet rehabilitation needs after stroke: A multicentre  
410 cohort study in Denmark and Norway. *Journal of Rehabilitation Medicine*  
411 2021;53:jrm00203.
- 412 23. Tistad M, Tham K, von Koch L, Ytterberg C. Unfulfilled rehabilitation needs and  
413 dissatisfaction with care 12 months after a stroke: an explorative observational study.  
414 *BMC Neurology* 2012;12:40.
- 415 24. Tistad M, von Koch L, Sjöstrand C, Tham K, Ytterberg C. What aspects of  
416 rehabilitation provision contribute to self-reported met needs for rehabilitation one  
417 year after stroke--amount, place, operator or timing? *Health Expectations*  
418 2013;16:e24-35.
- 419 25. Grube MM, Koennecke HC, Walter G, Thümmeler J, Meisel A, Wellwood I,  
420 Heuschmann PU, Berlin Stroke Register. Association between socioeconomic status  
421 and functional impairment 3 months after ischemic stroke: the Berlin Stroke Register.  
422 *Stroke* 2012;43:3325-3330.
- 423 26. Rimmer JH, Wang E, Smith D. Barriers associated with exercise and community  
424 access for individuals with stroke. *Journal of Rehabilitation Research & Development*  
425 2008;45:315-322.



427 **Table 1.** Baseline characteristics of the participants (N = 1,002)

|                                     |                                         | n             | (%)     |
|-------------------------------------|-----------------------------------------|---------------|---------|
| Responder                           | Patient                                 | 491           | (49)    |
|                                     | Proxy                                   | 511           | (51)    |
| Sex                                 | Female                                  | 367           | (36.6)  |
|                                     | Male                                    | 635           | (63.4)  |
| Age (mean, years)                   |                                         | 69.26 ± 12.43 |         |
|                                     | <70                                     | 537           | (53.6)  |
|                                     | ≥70                                     | 465           | (46.4)  |
| Education                           | ≤Middle school                          | 411           | (41)    |
|                                     | High school                             | 299           | (29.8)  |
|                                     | ≥College                                | 253           | (25.2)  |
|                                     | No response                             | 39            | (3.9)   |
| Living area                         | Capital region                          | 336           | (33.5)  |
|                                     | Non-capital                             | 666           | (66.5)  |
| Living alone                        | Yes                                     | 172           | (17.2)  |
|                                     | No                                      | 830           | (82.8)  |
| Time since stroke (years)           | 1-3                                     | 470           | (46.9)  |
|                                     | 3-6                                     | 532           | (53.1)  |
|                                     |                                         |               |         |
| Stroke type                         | Ischemic                                | 986           | (98.4)  |
|                                     | Hemorrhagic                             | 2             | (0.2)   |
|                                     | TIA                                     | 14            | (1.4)   |
| Past medical history                | Stroke                                  | 181           | (18.1)  |
|                                     | TIA                                     | 14            | (1.4)   |
|                                     | Coronary heart disease                  | 82            | (8.2)   |
|                                     | Hypertension                            | 617           | (61.6)  |
|                                     | Diabetes mellitus                       | 287           | (28.6)  |
|                                     | Hyperlipidemia                          | 284           | (28.3)  |
|                                     | Atrial fibrillation                     | 176           | (17.6)  |
| Smoking                             | Yes                                     | 363           | (36.3)  |
|                                     | No                                      | 639           | (63.8)  |
| Discharge status                    | Transfer to another department          | 220           | (22)    |
|                                     | Home discharge                          | 632           | (63.1)  |
|                                     | Referred                                | 149           | (14.9)  |
| NIHSS score                         | Initial NIHSS score (median, IQR = 1~3) | 3             | (1 – 6) |
|                                     | 0-4                                     | 651           | (65)    |
|                                     | 5-42                                    | 351           | (35)    |
| mRS score at the time of the survey |                                         |               |         |

|                                                   |       |            |
|---------------------------------------------------|-------|------------|
|                                                   | 0-2   | 745 (74.4) |
|                                                   | 3-5   | 257 (25.6) |
| Perceived<br>rehabilitation needs<br>after stroke | Unmet | 311 (32.6) |
|                                                   | Met   | 644 (67.4) |

428 IQR, interquartile range; mRS, modified Rankin Scale; NIHSS, National Institutes of Health Stroke Scale; SD,  
429 standard deviation; TIA, transient ischemic attack.

430

431 **Table 2.** Multiple linear regression model for health-related quality of life measured by the  
432 EQ-5D index

| Variables                            | $\beta$ | SE    | p-value |
|--------------------------------------|---------|-------|---------|
| Number of unmet needs                | -0.184  | 0.002 | <0.001  |
| Perceived unmet rehabilitation needs | -0.075  | 0.013 | 0.001   |
| Age                                  | -0.049  | 0     | 0.018   |
| Modified Rankin Scale score          | -0.650  | 0.004 | <0.001  |
| Previous stroke                      | -0.061  | 0.014 | 0.003   |

433 SE, standard error.

434 F = 327.888 (p < 0.001); adjusted R<sup>2</sup> for model = 0.650; Durbin-Watson = 2.132

435

436 **Table 3.** Perceived unmet rehabilitation needs after stroke

|                                      |                | Unmet<br>n = 311 (%) | Met<br>n = 644 (%) | Total<br>n = 955 (%) | p-value |
|--------------------------------------|----------------|----------------------|--------------------|----------------------|---------|
| Age (years)†                         | (mean ± SD)    | 70.6±11.5            | 68.4±12.8          | 69.1±12.4            | 0.008   |
|                                      | <70            | 119 (38.3)           | 314 (48.8)         | 433 (45.3)           | 0.002   |
|                                      | ≥70            | 192 (61.7)           | 330 (51.2)         | 522 (54.7)           |         |
| Sex                                  | Female         | 119 (38.3)           | 229 (35.6)         | 348 (36.4)           | 0.430   |
|                                      | Male           | 192 (61.7)           | 415 (64.4)         | 607 (63.6)           |         |
| Area of residence                    | Capital region | 96 (30.9)            | 227 (35.2)         | 323 (33.8)           | 0.189   |
|                                      | Non-capital    | 215 (69.1)           | 417 (64.8)         | 632 (66.2)           |         |
| Education*                           | ≤Middle school | 141 (46.5)           | 241 (39.0)         | 382 (41.5)           | 0.011   |
|                                      | High school    | 99 (32.7)            | 193 (31.2)         | 292 (31.7)           |         |
|                                      | ≥College       | 63 (20.8)            | 184 (29.8)         | 247 (26.8)           |         |
| Living alone                         | Yes            | 53 (17.0)            | 108 (16.8)         | 161 (16.9)           | 0.927   |
|                                      | No             | 258 (83.0)           | 536 (83.2)         | 794 (83.1)           |         |
| Time since stroke (years)            | 1-3            | 159 (51.1)           | 293 (45.5)         | 452 (47.3)           | 0.112   |
|                                      | 3-6            | 152 (48.9)           | 351 (54.5)         | 503 (52.7)           |         |
| Problems in mobility†                | No             | 79 (25.4)            | 405 (62.9)         | 484 (50.7)           | <0.001  |
|                                      | Yes            | 232 (74.6)           | 239 (37.1)         | 471 (49.3)           |         |
| Problems in self-care†               | No             | 119 (38.3)           | 475 (73.8)         | 594 (62.2)           | <0.001  |
|                                      | Yes            | 192 (61.7)           | 169 (26.2)         | 361 (37.8)           |         |
| Problems in usual activities†        | No             | 68 (21.9)            | 400 (62.1)         | 468 (49.0)           | <0.001  |
|                                      | Yes            | 243 (78.1)           | 244 (37.9)         | 487 (51.0)           |         |
| Problems in pain/discomfort†         | No             | 84 (27.5)            | 371 (58.6)         | 455 (48.5)           | <0.001  |
|                                      | Yes            | 221 (72.5)           | 262 (41.4)         | 483 (51.5)           |         |
| Problems in anxiety/depression†      | No             | 99 (33.1)            | 408 (64.9)         | 507 (54.6)           | <0.001  |
|                                      | Yes            | 200 (66.9)           | 221 (35.1)         | 421 (45.4)           |         |
| mRS score at the time of the survey† |                |                      |                    |                      | <0.001  |
|                                      | 0-2            | 184 (59.2)           | 531 (82.5)         | 715 (74.9)           | <0.001  |
|                                      | 3-5            | 127 (40.8)           | 113 (17.5)         | 240 (25.1)           |         |
| Initial NIHSS score                  |                | 5.2 ± 5.0            | 4.4 ± 4.8          |                      | 0.015   |
|                                      | 0-4            | 186 (59.8)           | 436 (67.7)         |                      | 0.017   |
|                                      | 5-42           | 125 (40.2)           | 208 (32.3)         |                      |         |
| Prior stroke*                        | No             | 244 (78.5)           | 540 (83.9)         | 784 (82.1)           | 0.047   |
|                                      | Yes            | 67 (21.5)            | 104 (16.1)         | 171 (17.9)           |         |
| Prior hyperlipidemia                 | No             | 209 (67.2)           | 472 (73.3)         | 681 (71.3)           | 0.056   |
|                                      | Yes            | 102 (32.8)           | 172 (26.7)         | 274 (28.7)           |         |
| Number of unmet needs†               | (mean ± SD)    | 6.9 ± 3.8            | 3.6 ± 3.0          | 4.6 ± 3.7            | <0.001  |

mRS, modified Rankin Scale; NIHSS, National Institutes of Health Stroke Scale; SD, standard deviation.

\*p < 0.05, †p < 0.01

438 **Table 4.** Age-adjusted logistic regression for perceived unmet rehabilitation needs

| Variable                           | OR   | 95% CI |       |
|------------------------------------|------|--------|-------|
|                                    |      | Lower  | Upper |
| Education level college or higher* | 0.66 | 0.45   | 0.96  |
| Problems in mobility†              | 4.96 | 3.64   | 6.76  |
| Problems in self-care†             | 4.46 | 3.32   | 5.98  |
| Problems in usual activities†      | 5.78 | 4.21   | 7.93  |
| Problems in pain/discomfort†       | 3.76 | 2.79   | 5.06  |
| Problems in anxiety/depression†    | 3.67 | 2.74   | 4.91  |
| Modified Rankin Scale score†       | 3.13 | 2.29   | 4.28  |
| Prior hyperlipidemia*              | 1.35 | 1.00   | 1.81  |
| Number of unmet needs†             | 1.30 | 1.25   | 1.36  |

439 CI, confidence interval; OR, odds ratio.

440 † p < 0.01

441 \* p < 0.05

442

443 **Figure 1. Study flow**

444

**Called = 9,204**  
Random sampling followed by telephone survey by trained interviewers using a computer-assisted telephone interview method

Dropped out = 6,022  
- Failed to connect (4,690)  
- Connected but terminated without answer (266)  
- Wrong number (1,066)

**Contacted = 3,182**

Dropped out = 1,419  
- Refused (1,417): refused to participate (702), busy (20), driving (66), at work (77), no answer after later appointment (50), stopped before completion (475), absent (27)  
- Inappropriate answer (2)  
  
Excluded = 761  
- Death (178), denial of treatment history at the hospital (159), non-community dwelling (257), others (167)

**Responders = 1,002**
